# Supplementary material for: Sero-Molecular Epidemiology of Japanese Encephalitis in Zhejiang, an Eastern Province of China
Source: PubMed Central journal article supplement (PMC4999095; doi:10.1371/journal.pntd.0004936), 2016-08-25
Supplement: pntd.0004936.s002.pdf [file pntd.0004936.s002.pdf]

## Supporting Information

### S2

#### Concise information of 28 strains of Japanese encephalitis virus isolated from Zhejiang

| Strain   | year | Source                         | Genotype | Accession no. |
|----------|------|--------------------------------|----------|---------------|
| ZJ82-2   | 1982 | <i>Culex tritaeniorhynchus</i> | III      | KJ000038      |
| ZJ82-6   | 1982 | <i>Culex tritaeniorhynchus</i> | III      | KJ000039      |
| ZJ83-8   | 1983 | <i>Culex tritaeniorhynchus</i> | III      | KJ000040      |
| ZJ83-13  | 1983 | <i>Culex tritaeniorhynchus</i> | III      | KJ000041      |
| ZJ83-14  | 1983 | <i>Culex pipiens pallens</i>   | III      | KJ000042      |
| XJ69     | 2007 | <i>Culex tritaeniorhynchus</i> | I        | EU258742      |
| XJP613   | 2007 | <i>Culex tritaeniorhynchus</i> | I        | EU258741      |
| JX61     | 2008 | pig serum                      | I        | GU556217      |
| ZJ09-52  | 2009 | <i>Culex tritaeniorhynchus</i> | I        | JN216865      |
| ZJ109-08 | 2009 | <i>Culex tritaeniorhynchus</i> | I        | JN216866      |
| ZJ10-07  | 2010 | <i>Culex tritaeniorhynchus</i> | I        | JN216867      |
| ZJ10-10  | 2010 | <i>Culex tritaeniorhynchus</i> | I        | JN216868      |
| ZJ10-45  | 2010 | <i>Culex tritaeniorhynchus</i> | I        | JN216870      |
| ZJ12-03  | 2012 | <i>Culex tritaeniorhynchus</i> | I        | KJ000029      |
| ZJ12-04  | 2012 | <i>Culex tritaeniorhynchus</i> | I        | KJ000030      |
| ZJ12-06  | 2012 | <i>Culex tritaeniorhynchus</i> | I        | KJ000031      |
| ZJ12-07  | 2012 | <i>Culex tritaeniorhynchus</i> | I        | KJ000032      |
| ZJ13-02  | 2013 | <i>Culex tritaeniorhynchus</i> | I        | KM079081      |
| ZJ13-03  | 2013 | <i>Culex tritaeniorhynchus</i> | I        | KM079082      |
| ZJ13-06  | 2013 | <i>Culex tritaeniorhynchus</i> | I        | KJ000033      |
| ZJ13-07  | 2013 | <i>Culex tritaeniorhynchus</i> | I        | KJ000034      |
| ZJ13-09  | 2013 | <i>Anopheles sinensis</i>      | I        | KJ000035      |
| ZJ13-10  | 2013 | <i>Culex tritaeniorhynchus</i> | I        | KJ000036      |
| ZJ13-11  | 2013 | <i>Culex tritaeniorhynchus</i> | I        | KJ000037      |
| ZJ13-28  | 2013 | <i>Culex tritaeniorhynchus</i> | I        | KM079084      |
| ZJ13-33  | 2013 | <i>Anopheles sinensis</i>      | I        | KM079085      |
| ZJ14-09  | 2014 | <i>Culex tritaeniorhynchus</i> | I        | KM576776      |
| ZJ14-10  | 2014 | <i>Culex tritaeniorhynchus</i> | I        | KM576777      |
